# Supplementary material for: Sparse cliques trump scale-free networks in coordination and competition
Source: PubMed Central journal article supplement (PMC4761901; doi:10.1038/srep21870), 2016-02-22
Supplement: srep21870-s1.pdf [file srep21870-s1.pdf]

# **Sparse cliques trump scale-free networks in coordination and competition**

David A. Gianetto

Babak Heydari

## Cooperation versus $T$ for sample networks (SI1)

For pure strategies on a square lattice, [1] finds a power-law relationship between temptation to defect  $T(b)$  in the PD game and cooperation level, which can be related to *two-dimensional directed percolation* according to [1], and high  $T(b)$  results in cooperators disappearing from the population entirely when  $T(b) > 1.6$  with  $\beta = 2$ . We show a different effect for stochastic reactive strategies (see figure 1) where cooperation declines with  $T(b)$  but does not disappear with high  $T(b)$  and the trend is more linear than exponential in nature. This result holds for the Snowdrift and Stag Hunt games. Further,  $q$  is unaffected by  $T(b)$  in the PD game but declines with the other components in the SD and SH games. In the SH game, for high  $T(b)$ , reciprocity  $p$  and trust  $y$  do not decline as they do for the full graph (figure 1 SH panel), the decline is near linear for the lattice though the decline becomes much more steep for the full graph above  $T(b) > 1/2$ .

The lattice (figure 1) and clique (figure 3) structures essentially behave the same in the PD game versus  $T(b)$ , though cooperation on the clique graph is higher for all  $T(b)$ .

Cooperation in the scale free graph (figure 2) is higher than the full graph in the PD but the trend versus  $T(b)$  is flat.

---

[1] Szabó, G. & Hoke, C. Evolutionary prisoners dilemma game on a square lattice. *Physical Review E* **58**, 69 (1998).

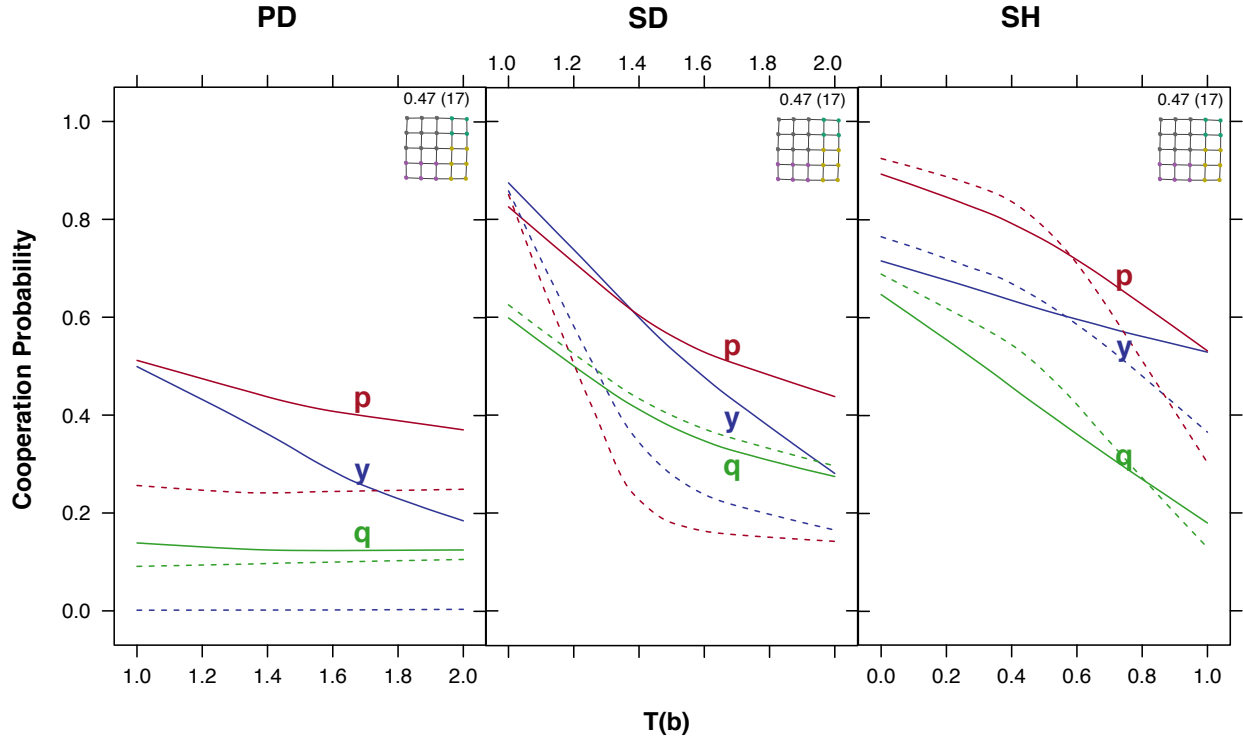

FIG. 1. Cooperation part versus  $T(b)$  for a square lattice.

The figure shows the local least squares trend in cooperation for each stochastic component, for the PD, SD, and SH games.  $\beta = 1$  for all games. Dashed lines are trends for the full graph.

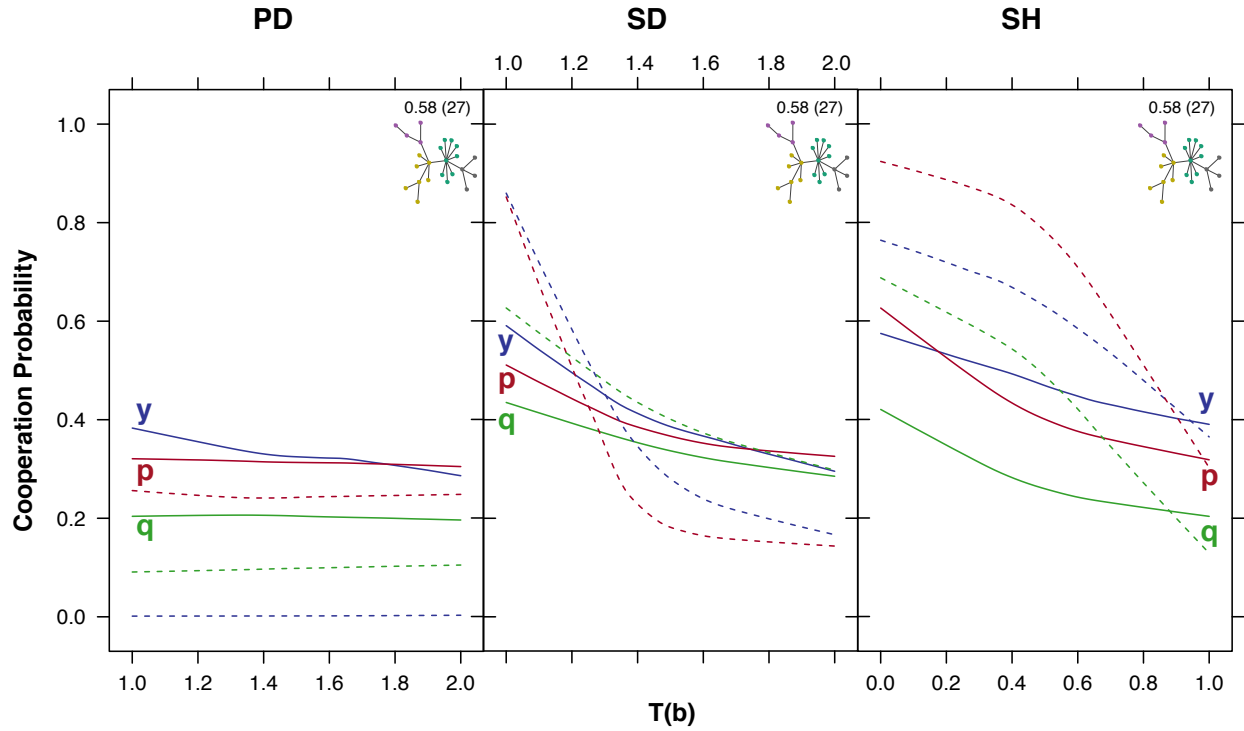

FIG. 2. Cooperation part versus  $T(b)$  for a scale free graph.

The figure shows the local least squares trend in cooperation for each stochastic component, for the PD, SD, and SH games.  $\beta = 1$  for all games. Dashed lines are trends for the full graph.

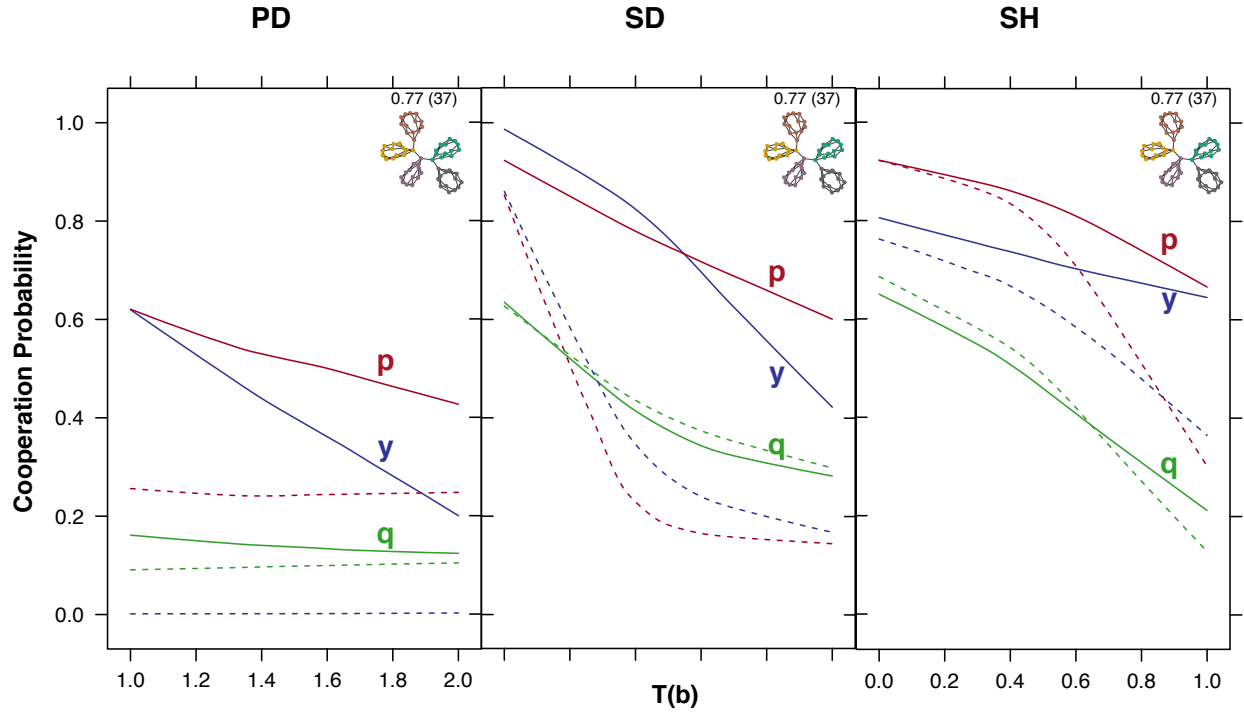

FIG. 3. Cooperation part versus  $T(b)$  for a clique graph.

The figure shows the local least squares trend in cooperation for each stochastic component, for the PD, SD, and SH games.  $\beta = 1$  for all games. Dashed lines are trends for the full graph.
